# Supplementary material for: CoO octahedral nanocages for high-performance lithium ion batteries
Source: Royal Society of Chemistry journal article supplement (doi:10.1039/c2cc30843f), 2012-01-01
Supplement: c2cc30843f.pdf [file c2cc30843f.pdf]

Electronic supplementary information for

## **CoO octahedral nanocages for high-performance lithium ion batteries**

Hasigaowa Guan,<sup>a,\*</sup> Xi Wang,<sup>b,\*</sup> Huiqiao Li,<sup>c,\*</sup> Chunyi Zhi,<sup>b,\*</sup> Tianyou Zhai,<sup>b</sup> Yoshio Bando,<sup>b</sup>  
and Dmitri Golberg<sup>b</sup>

<sup>a</sup> Key Laboratory of Marine Chemistry Theory and Technology, Ministry of Education, Ocean University of China, Qingdao 266100, China

E-mail: [hsgwguan@gmail.com](mailto:hsgwguan@gmail.com)

<sup>b</sup>International Center for Materials Nanoarchitectonics (MANA), National Institute for Materials Science (NIMS), Namiki 1-1, Tsukuba, Ibaraki, 305-0044, Japan.

E-mail: [Wang.Xi2@nims.go.jp](mailto:Wang.Xi2@nims.go.jp), [Zhi.Chunyi@nims.go.jp](mailto:Zhi.Chunyi@nims.go.jp)

<sup>c</sup>Energy Technology Research Institute, National Institute of Advanced Industrial and Technology (AIST), Umezono, 1-1-1, Tsukuba, 305-8568, Japan. E-mail:

[huiqiaoli@gmail.com](mailto:huiqiaoli@gmail.com)

## Experimental

*Synthesis of porous CoO octahedral nanocages:* In a typical synthesis, 1 g of cobalt acetate tetrahydrate ( $\text{Co}(\text{AC})_2 \cdot 4\text{H}_2\text{O}$ ) were dispersed into 70 mL ethanol and the above solution was transformed into a 100 mL Teflon-lined stainless steel autoclave. The autoclave was sealed and maintained at 160-170 °C for 24 h and then cooled down to room temperature. And then 0.01-0.3 g of urea was added into above reaction system, followed by heating 60°C for 24 h. The final products were centrifuged, rinsed with distilled water and ethanol several times to remove any impurities that remained in the final products.

**Characterization.** X-ray powder diffraction (XRD) patterns were recorded on a Philips X'Pert PRO MPD X-ray diffractometer operated at 35 kV and 45 mA with Cu  $\text{K}\alpha$  radiation. Transmission electron microscopy (TEM) images were obtained on a JEOL JEM-3000F transmission electron microscope with an accelerating voltage of 300 kV. FE-SEM analysis was carried out with a field-emission microscope (JEOL S4800) operated at an acceleration voltage of 10 kV.

*Electrochemical Characterization:* Electrochemical experiments were performed using coin cells. The working electrodes prepared by mixing the CoO samples, acetylene black, and poly (vinyl difluoride) (PVDF) at a weight ratio of 70:20:10, were pasted on pure Cu foil. Glass fibber (GF/D) from Whatman was used as a separator. Lithium foil was used as the counter electrode. The electrolyte consisted of a solution of 1 M  $\text{LiPF}_6$  in ethylene carbonate (EC)/dimethyl carbonate (DMC)/diethyl carbonate (DEC) (1:1:1, in wt %). Galvanostatic discharge/charge measurements were performed in a potential range of 3 V-0.05 V vs  $\text{Li}^+/\text{Li}$ .

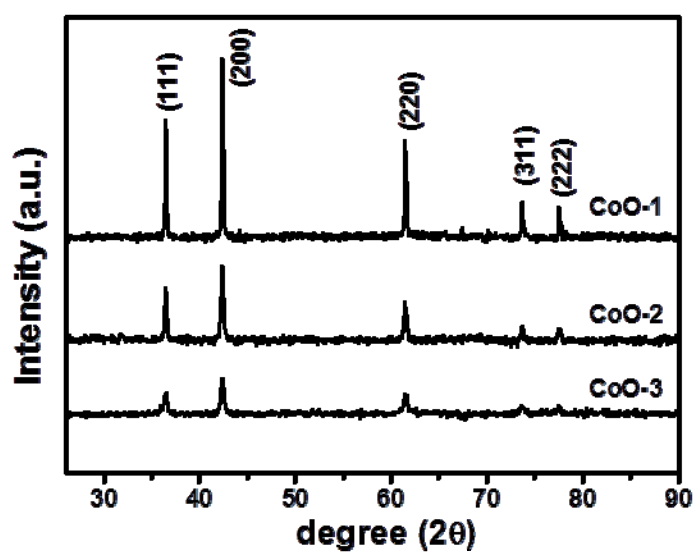

**Fig. S1** XRD patterns of the three samples obtained by the addition of the different amounts of urea: CoO octahedrons (CoO-1, without addition of urea), octahedral CoO nanocages (CoO-2), CoO hollow microspheres (CoO-3).

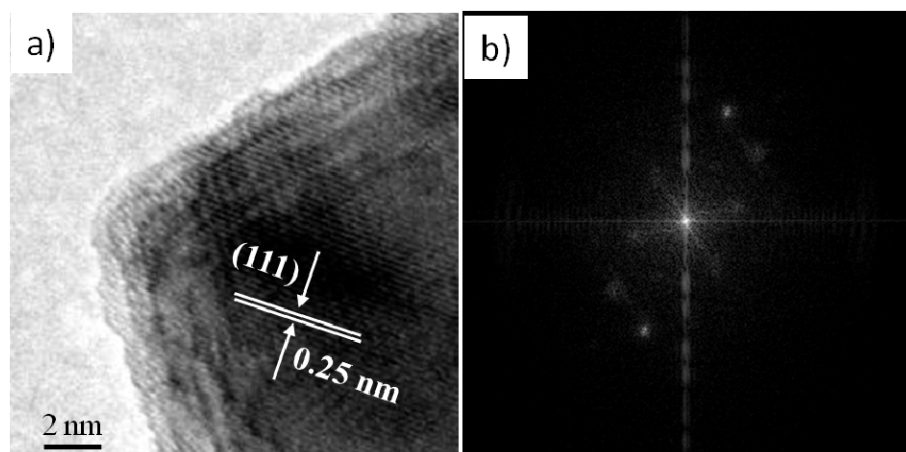

**Fig. S2** Characterizations of CoO octahedrons (CoO-1): a) High resolution TEM image, b) Its corresponding fast Fourier transform pattern (FFT).

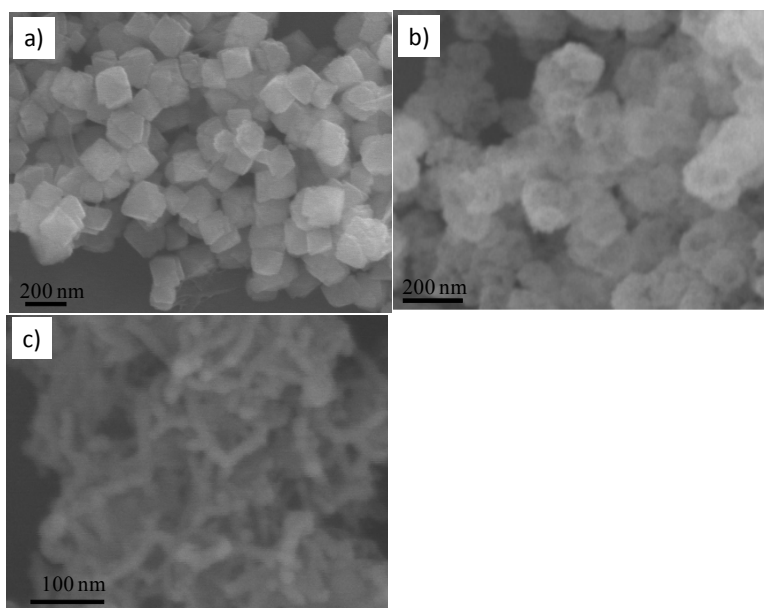

**Fig. S3** SEM images of the products with different morphologies obtained with addition of urea at different reaction stages under the same condition of CoO-2: a) Solid CoO nanooctahedrons, 0 h, b) Hollow CoO nanocages, 36 h, c) CoO octahedral nanoframes, 48 h.

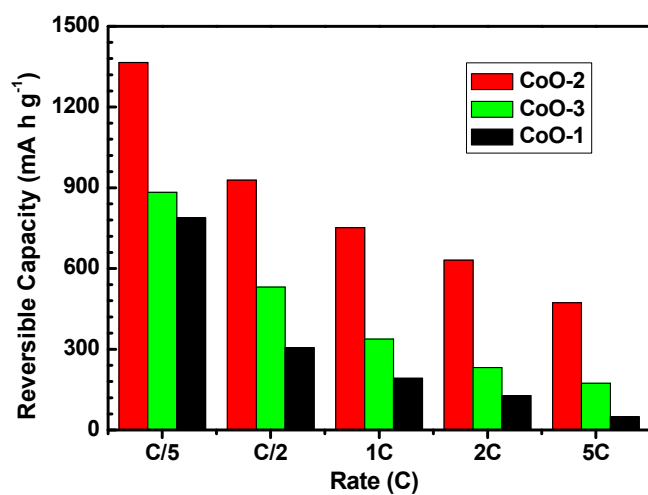

**Fig. S4** The comparative rate capabilities of three CoO samples, respectively.
